# Supplementary material for: Transport-exclusion pharmacology to localize lactate dehydrogenase activity within cells
Source: PubMed Central journal article supplement (PMC6290536; doi:10.1186/s40170-018-0192-5), 2018-12-12
Supplement: 40170_2018_192_MOESM1_ESM.pdf [file 40170_2018_192_MOESM1_ESM.pdf]

### HeLa cell mitochondrial respiration

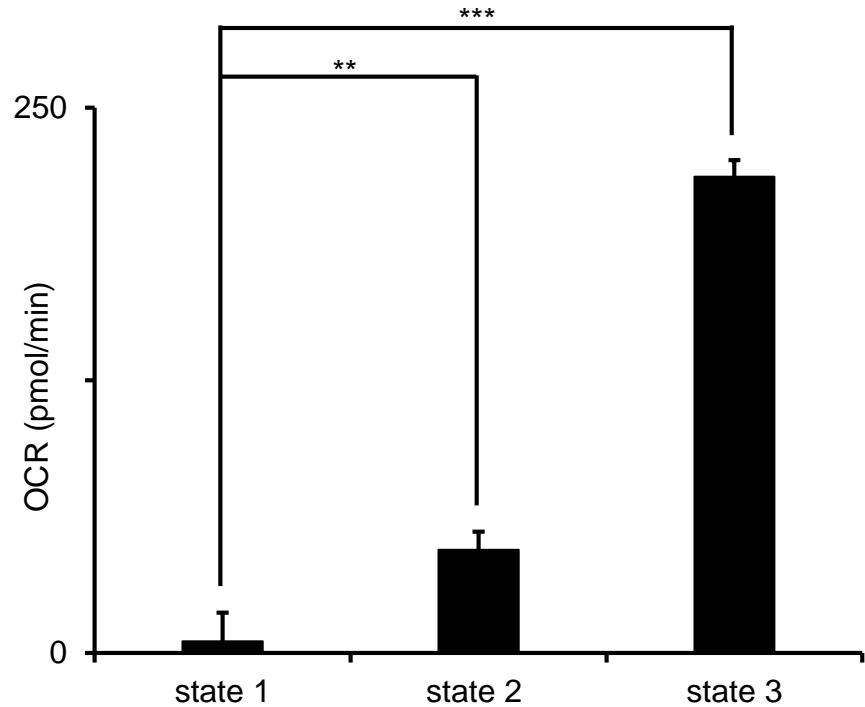

**Figure S1:** OCR data from purified HeLa cell mitochondria. State 1 data are from purified mitochondria alone. State 2 data are from purified mitochondria incubated with 10 mM lactate and 5 mM malate, without ADP. State 3 data are from purified mitochondria incubated with 10 mM lactate, 5 mM malate, and 4 mM ADP. Data shown are averages from groups of n=3. \*\* p<0.01 and \*\*\*p<0.001.
