# Supplementary material for: Transport-exclusion pharmacology to localize lactate dehydrogenase activity within cells
Source: PubMed Central journal article supplement (PMC6290536; doi:10.1186/s40170-018-0192-5), 2018-12-12
Supplement: 40170_2018_192_MOESM2_ESM.pdf [file 40170_2018_192_MOESM2_ESM.pdf]

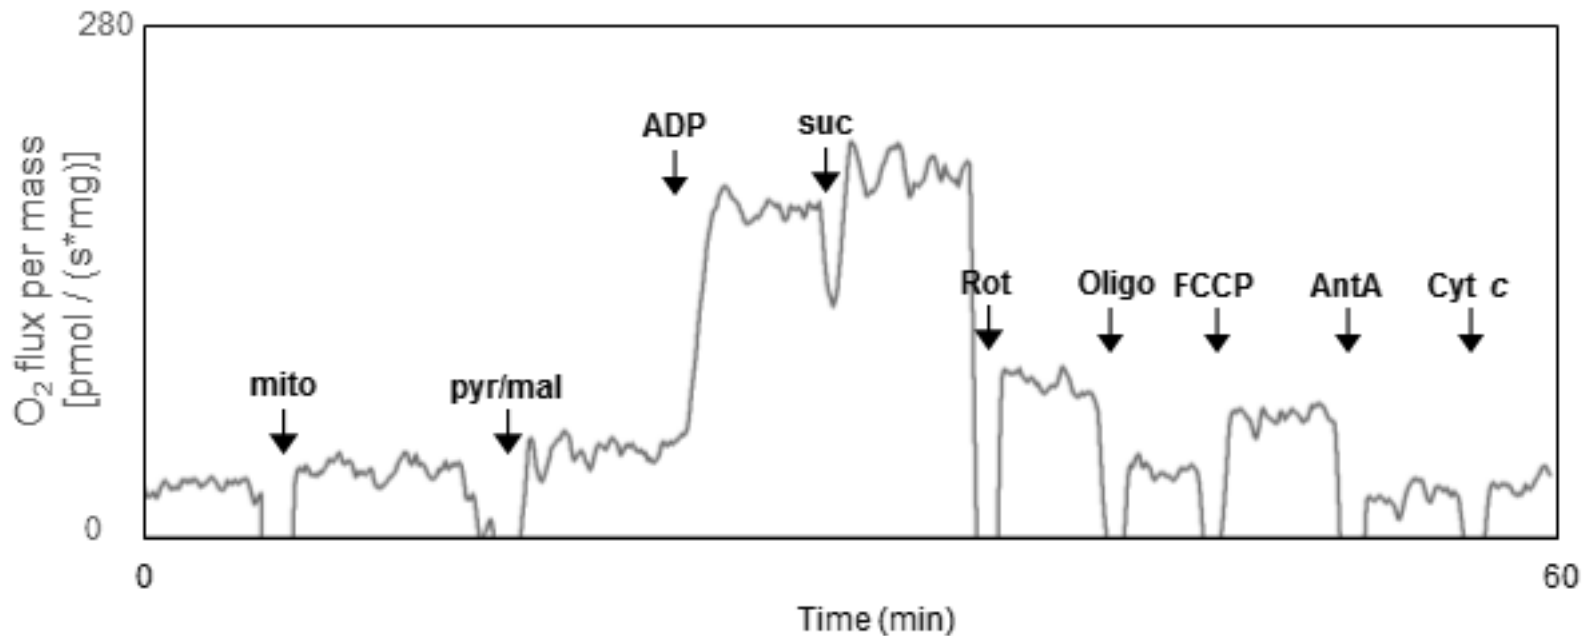

**Figure S2:** Respiration of purified mitochondria from HeLa cells. Oxygen consumption rate was measured in response to the addition of mitochondria (mito), substrates (pyruvate/malate, pyr/mal; ADP; succinate, suc), inhibitors (rotenone, Rot; oligomycin, Oligo; antimycin A, AntA), an uncoupler (FCCP), and cytochrome c (Cyt c).
