# Supplementary material for: Transport-exclusion pharmacology to localize lactate dehydrogenase activity within cells
Source: PubMed Central journal article supplement (PMC6290536; doi:10.1186/s40170-018-0192-5), 2018-12-12
Supplement: 40170_2018_192_MOESM3_ESM.pdf [file 40170_2018_192_MOESM3_ESM.pdf]

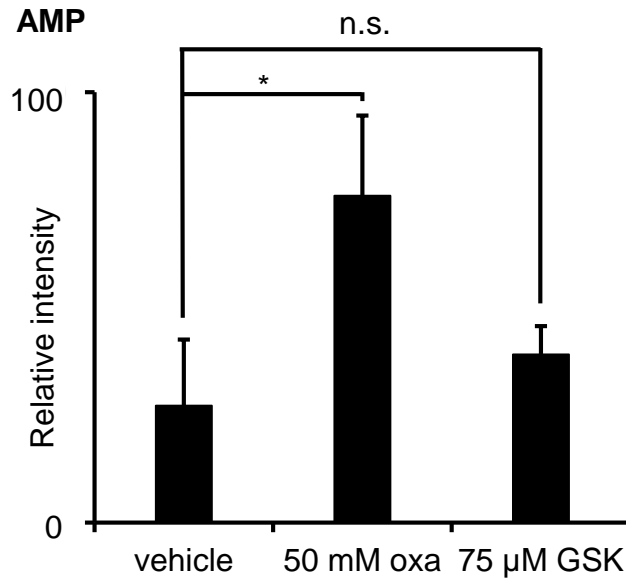

**Figure S3:** AMP levels are increased after treating HeLa cells with oxamate (oxa) for 24 h but not after treating them with GSK-2837808A (GSK) for 24 h. No significant changes in the levels of ATP or ADP were found. All data shown are averages from groups of n=3. \* p<0.05; n.s., no statistical significance.
