# Supplementary material for: Transport-exclusion pharmacology to localize lactate dehydrogenase activity within cells
Source: PubMed Central journal article supplement (PMC6290536; doi:10.1186/s40170-018-0192-5), 2018-12-12
Supplement: 40170_2018_192_MOESM4_ESM.pdf [file 40170_2018_192_MOESM4_ESM.pdf]

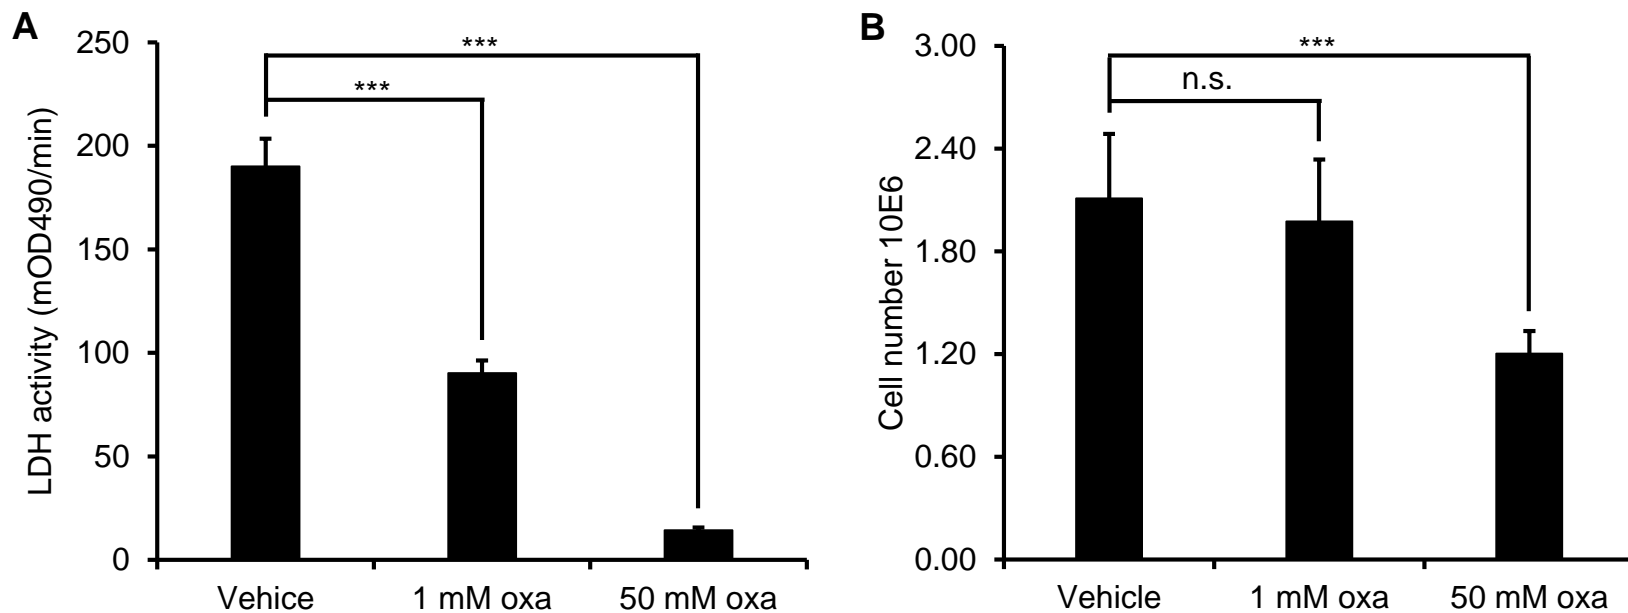

**Figure S4:** Response of HeLa cells to different concentrations of oxamate.

(A) HeLa cell mitochondrial lysates were treated with oxamate, and LDH activity was measured by using a colorimetric assay. (B) HeLa cell proliferation was measured after treatment with oxamate for 24 h. No DMSO was added to the samples. Data shown are averages from groups of  $n=3$ . \*\*\* $p < 0.001$ ; n.s., no statistical significance.
